# Supplementary material for: Alternative Promoter use Governs the Expression of IgLON Cell Adhesion Molecules in Histogenetic Fields of the Embryonic Mouse Brain
Source: Preprints.org preprint supplement (doi:10.20944/preprints202105.0247.v1), 2021-05-11
Supplement: Supplementary file 2 [file supplementary]

**Supplementary Material**

**Alternative promoter use governs the expression of IgLON cell adhesion molecules in histogenetic fields of the embryonic mouse brain**

Toomas Jagomäe1,2# , Katyayani Singh1#*, Mari-Anne Philips1, Mohan Jayaram1, Kadri Seppa1,2, Triin Tekko3, Scott F. Gilbert4, Eero Vasar1, Kersti Lilleväli1

1 Institute of Biomedicine and Translational Medicine, Department of Physiology, University of Tartu, 19 Ravila Street, Tartu 50411, Estonia

2  Institute of Biomedicine and Translational Medicine, Laboratory Animal Centre, University of Tartu, 14B Ravila Street, Tartu 50411, Estonia

3 The Instituto Gulbenkian de Ciência, Rua da Quinta Grande 6, 2780-156 Oeiras, Portugal

4 Department of Biology, Swarthmore College, Swarthmore, PA, USA

# equal contribution

*correspondence


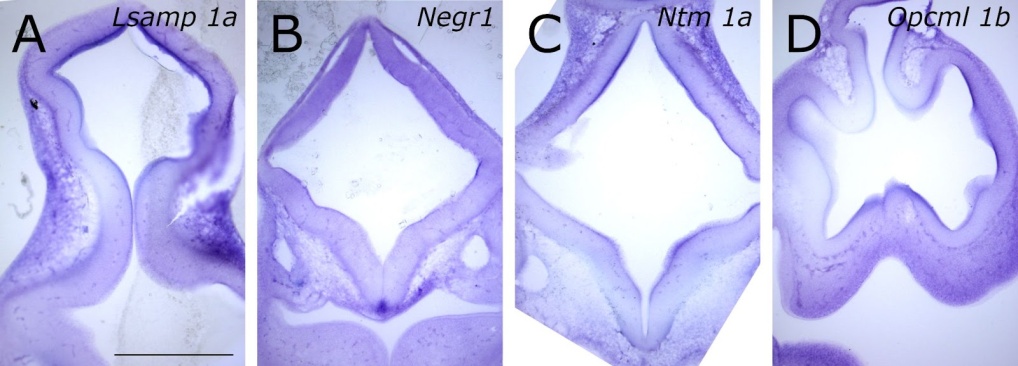


**Supplementary Figure S1. *In situ* mRNA hybridization displaying *Lsamp 1a*, *Negr1*, *Ntm 1a* and *Opcml 1b* at E10.5 coronal sections.** (A) signal from *Lsamp 1a* probe is intense in the ventricular zone. (B) Intense expression of *Negr1* is observable at the floor plate. (C) *Ntm 1a* expression is established dorsally in the ventricular zone and in the developing ganglionic eminences. (D) singal from *Opcml 1b* probe is observable throughout the ventricular zone of the developing nervous system.  Scale bar: 1 mm.
